# Supplementary material for: Self-Assembly of 1D/2D Hybrid Nanostructures Consisting of a Cd(II) Coordination Polymer and NiAl-Layered Double Hydroxides
Source: MDPI journal article supplement (doi:10.3390/polym8010005), 2015-12-29
Supplement: s1 [file s1]

# Supplementary Materials: Self-Assembly of 1D/2D Hybrid Nanostructures Consisting of Cd(II) Coordination Polymer and NiAl-Layered Double Hydroxides

Gonzalo Abellán, Pilar Amo-Ochoa, José Luis G. Fierro, Antonio Ribera, Eugenio Coronado and Félix Zamora

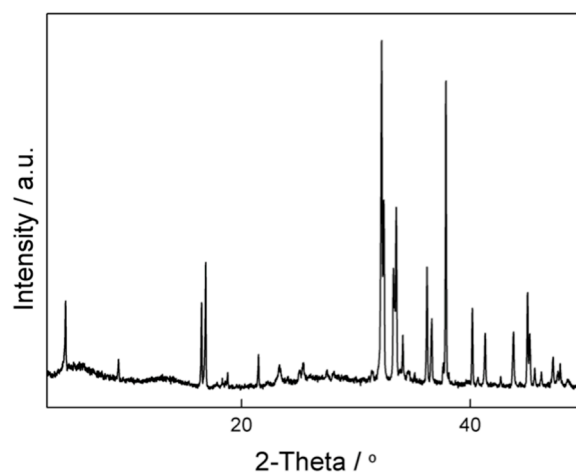

Figure S1. X-ray powder diffraction pattern of  $\text{Na}_{2n}[\text{Cd}(\text{6-MP}^{2-})_2]_n$ .

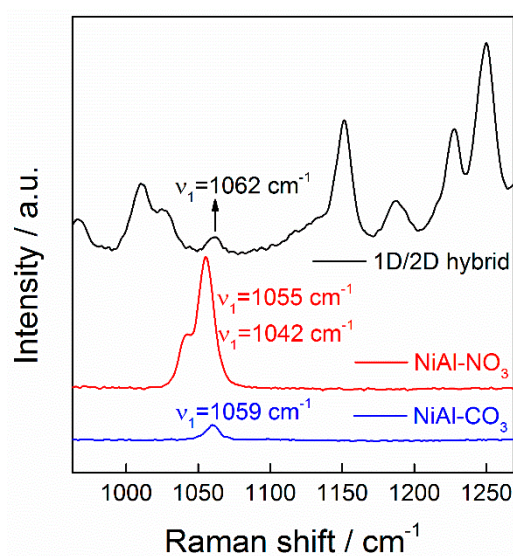

Figure S2. Raman spectra of the NiAl-CO<sub>3</sub>, the NiAl-NO<sub>3</sub> and the 1D/2D-hybrid.

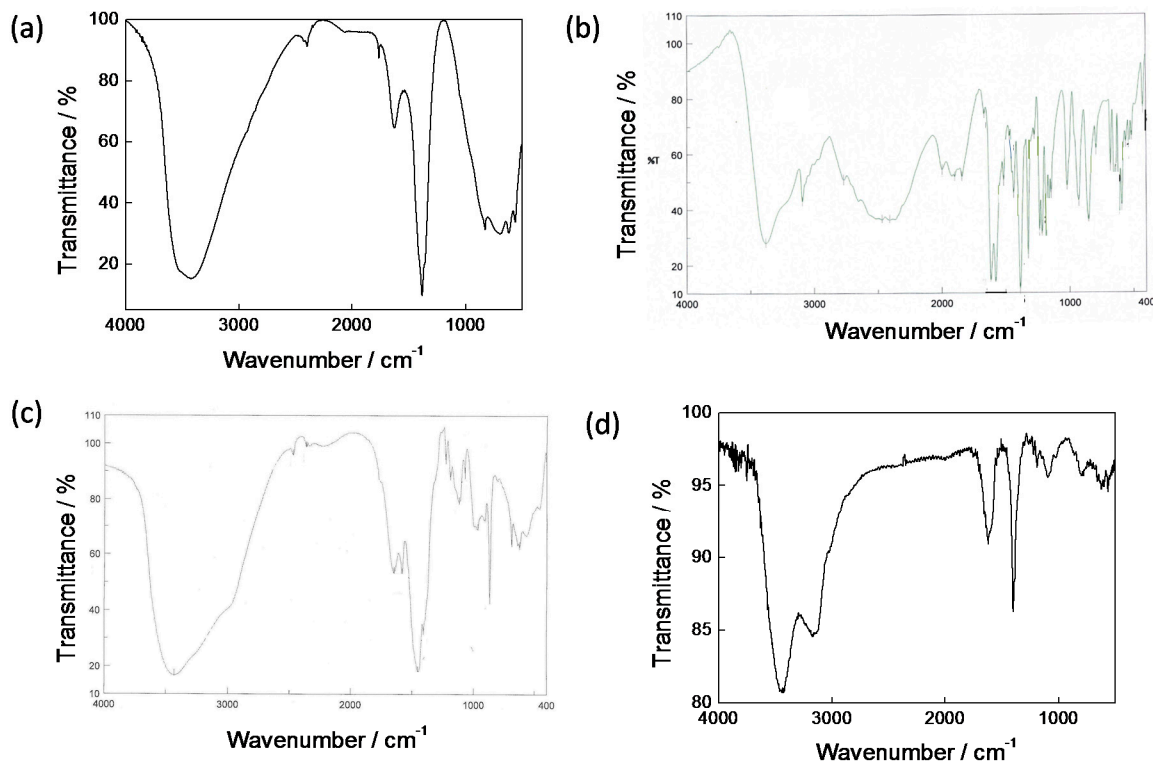

Figure S3. FTIR spectra of (a) NiAl-NO<sub>3</sub> LDH,<sup>1</sup> (b) [Cd(6-MP<sup>-</sup>)<sub>2</sub>·2H<sub>2</sub>O]<sub>n</sub> (6-MPH= 6-mercaptopurine) 1D-CP(Cd); (c) Na<sub>2n</sub>[Cd(6-MP<sup>2-</sup>)<sub>2</sub>]<sub>n</sub> and (d) 1D/2D hybrid materials.

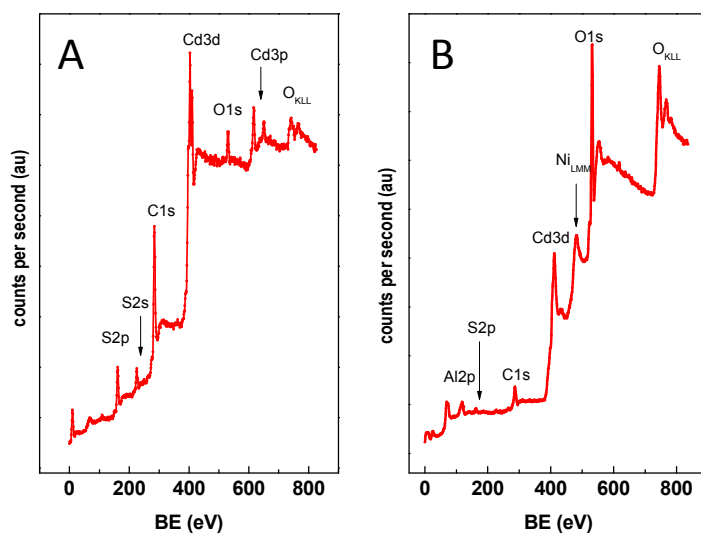

Figure S4. XPS survey spectra of [Cd(6-MP<sup>-</sup>)<sub>2</sub>·2H<sub>2</sub>O]<sub>n</sub> and 1D/2D hybrid material.

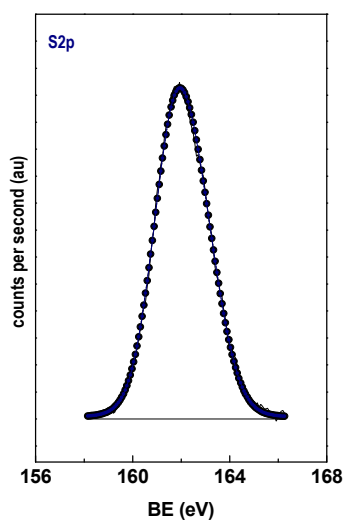

Figure S5. S2p core-level spectra of  $[\text{Cd}(6\text{-MP}^-)_2 \cdot 2\text{H}_2\text{O}]_n$ .

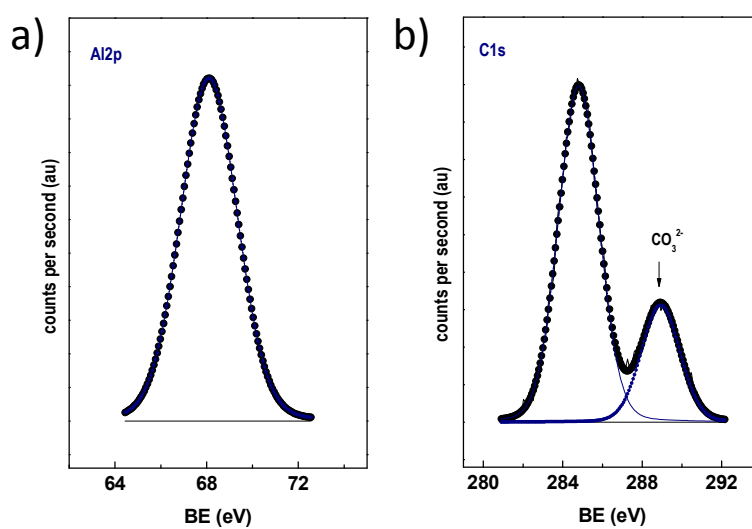

Figure S6. Al2p (a) and C1s (b) core-level spectra of NiAl-CO<sub>3</sub> LDH.

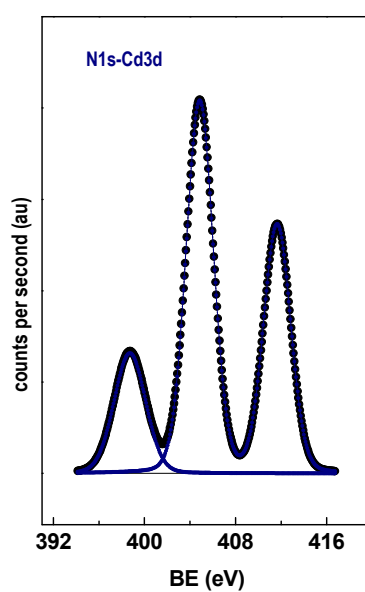

Figure S7. Ni2p core-level spectra of 1D/2D hybrid material.

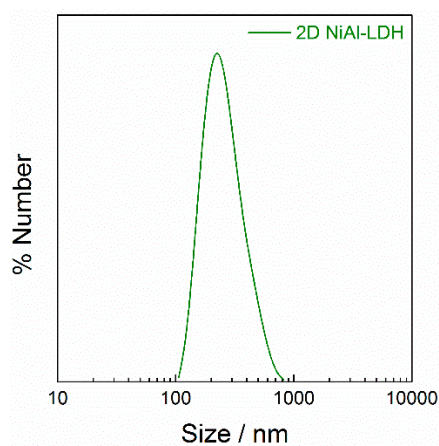

**Figure S8.** Dynamic light scattering (DLS) size distribution of the exfoliated NiAl-NO<sub>3</sub> LDH in formamide measured after 72 h, highlighting the stability of the samples [36].

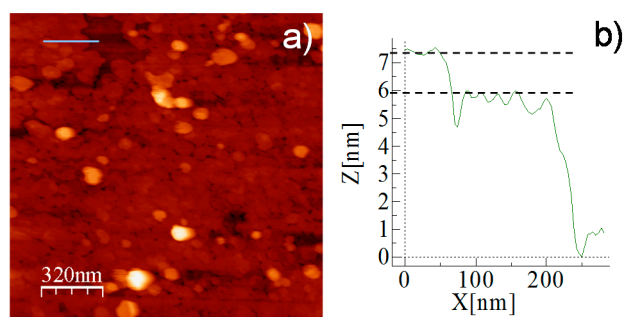

**Figure S9.** (a) Topographic AFM image on SiO<sub>2</sub> of the NiAl-NO<sub>3</sub> LDH exfoliated in formamide; and (b) its height profile showing a typical step of *ca.* 1 nm.

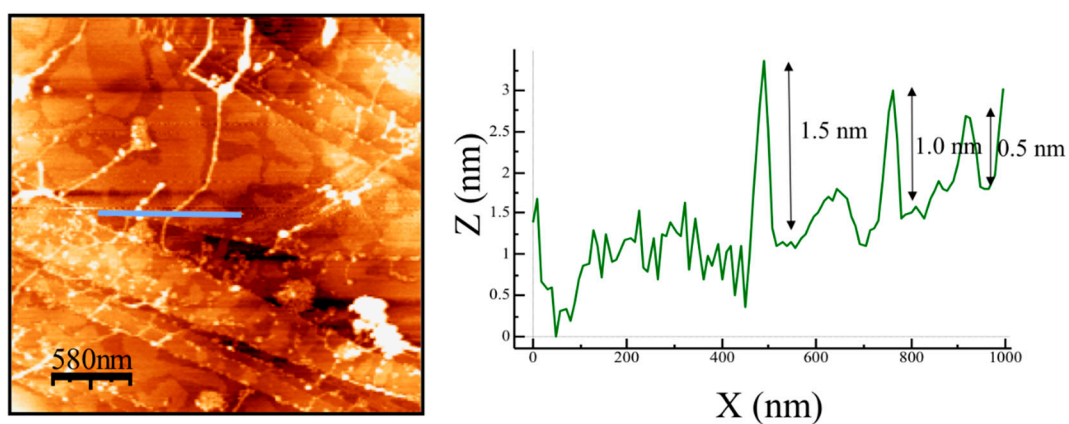

**Figure S10.** Topography AFM image of [Cd(6-MP<sup>-</sup>)<sub>2</sub>·2H<sub>2</sub>O]<sub>n</sub> (left) and its height profile (right) showing from a single chain of 0.5 nm to bundles compose of 2 and 3 chains.

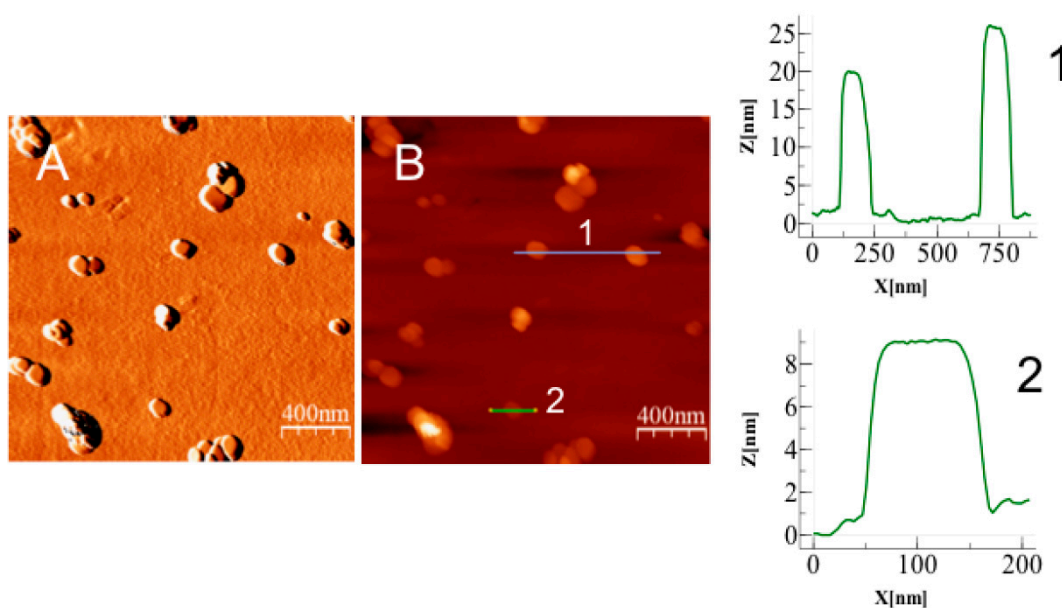

**Figure S11.** AFM topography image of NiAl-LDH material drop-casted on SiO<sub>2</sub> substrate. (A) Topographic and (B) derivate images with two typical height profiles (1,2).

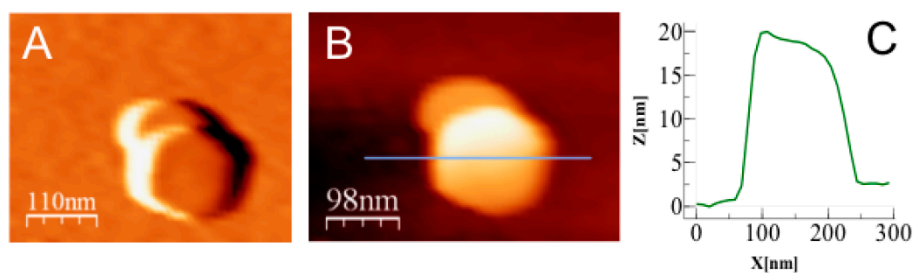

**Figure S12.** AFM topography image of NiAl-LDH material drop-casted on SiO<sub>2</sub> substrate. (A) Topographic and (B) derivate images and (C) its height profile showing the planar surface of the crystal.

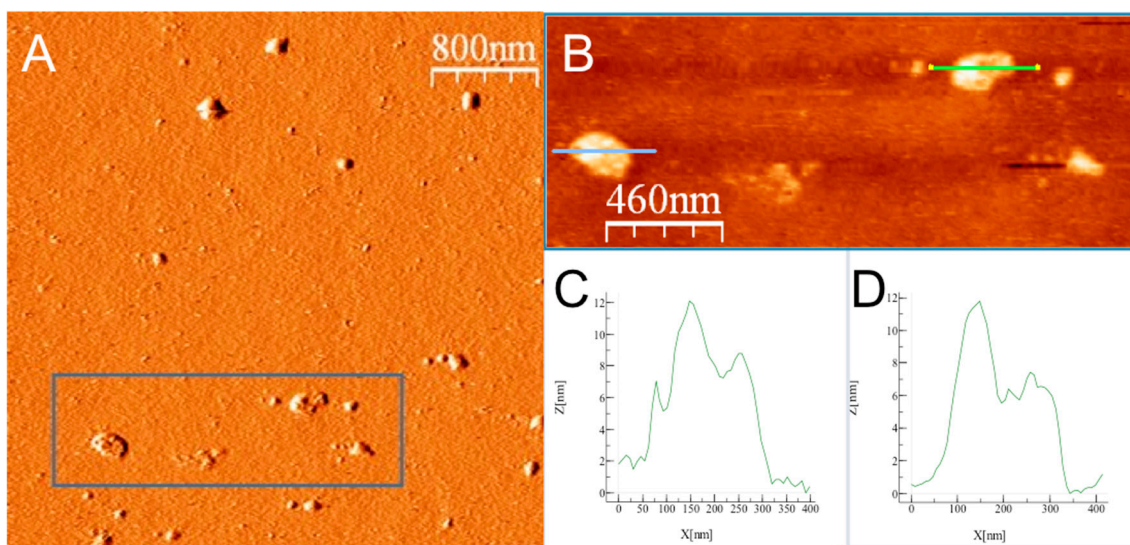

**Figure S13.** Large area topography AFM image of 1D/2D hybrid material drop-casted on SiO<sub>2</sub> substrate (A); and a zoomed image (B) with two typical height profiles (C,D) showing from a single chain of 0.5 nm to bundles compose of 2 and 3 chains of [Cd(6-MP<sup>-</sup>)<sub>2</sub>·2H<sub>2</sub>O].

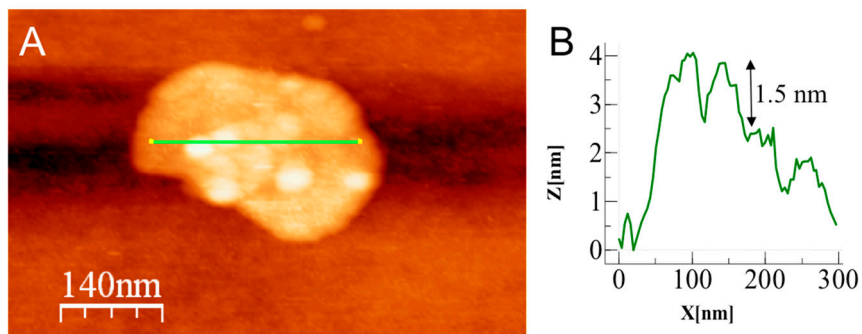

**Figure S14.** (A) AFM topography image of a single sheet of **1D/2D hybrid** nanomaterial drop-casted on SiO<sub>2</sub> substrate, and (B) its height profile showing adsorption of *ca.* one to three chains of [Cd(6-MP<sup>-</sup>)<sub>2</sub>·2H<sub>2</sub>O].

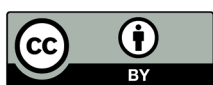

© 2015 by the authors; licensee MDPI, Basel, Switzerland. This article is an open access article distributed under the terms and conditions of the Creative Commons by Attribution (CC-BY) license (<http://creativecommons.org/licenses/by/4.0/>).
